# Supplementary material for: A novel pH-dependent membrane peptide that binds to EphA2 and inhibits cell migration
Source: eLife journal article supplement (doi:10.7554/elife.36645), 2018-09-17

# Figure Supplement 6

**A** TYPE7  
pHLIP

EFQTLSP**E**GSGNLAVIGGVAVGVVL**E**LVLAGV**E**FFI**EEEE**  
AA**E**QNPIYWARYAD**D**WLFTTPLL**L**LDLALLVD**A**DE**G**T

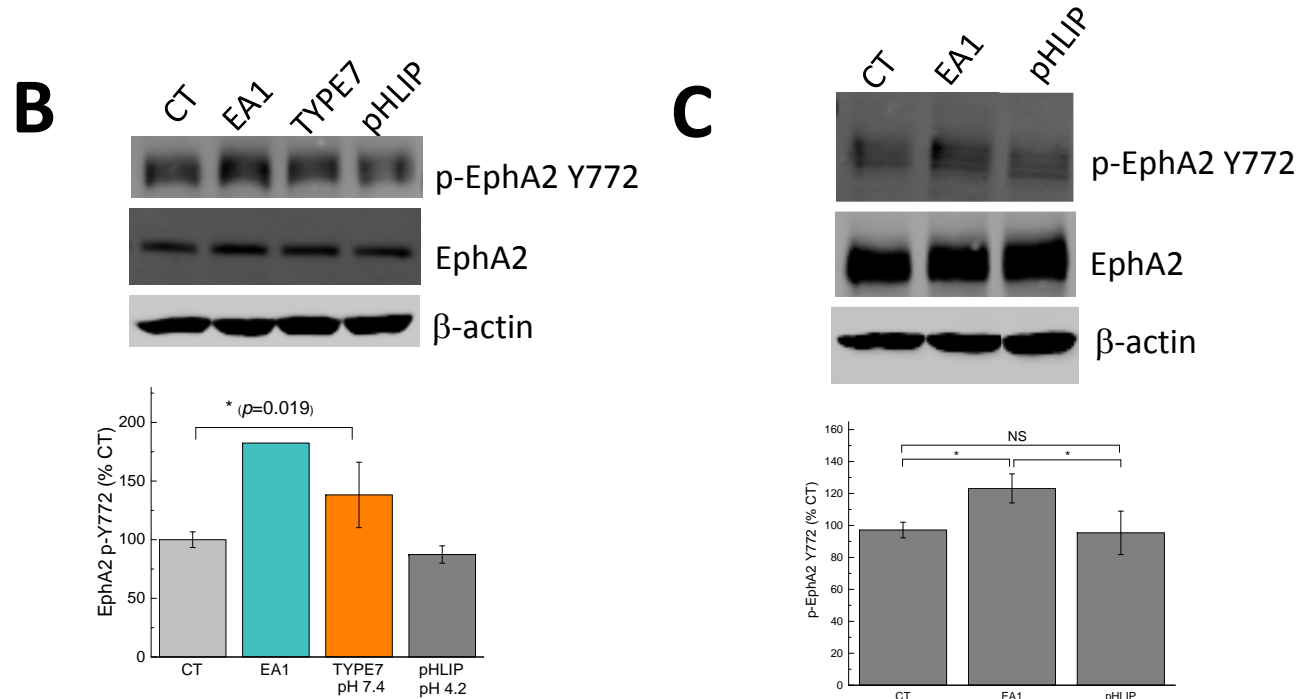

Supplement: supp [file elife-36645-supp-v1.zip]
