# Supplementary material for: A novel pH-dependent membrane peptide that binds to EphA2 and inhibits cell migration
Source: eLife journal article supplement (doi:10.7554/elife.36645), 2018-09-17
Supplement: supp [file elife-36645-supp-v1.zip]

# Figure Supplement 9

**A**

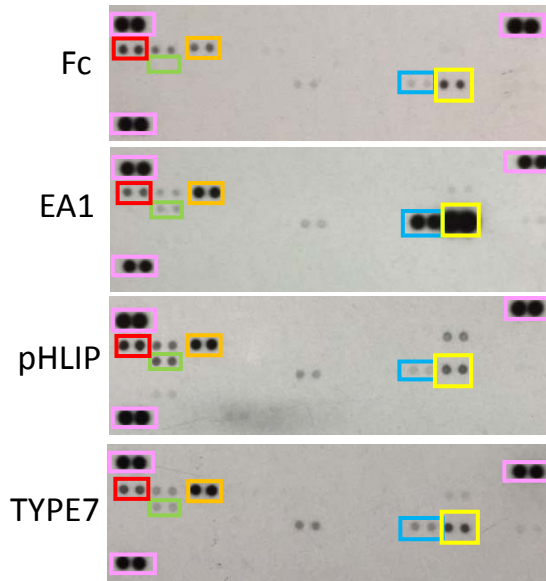

**B**

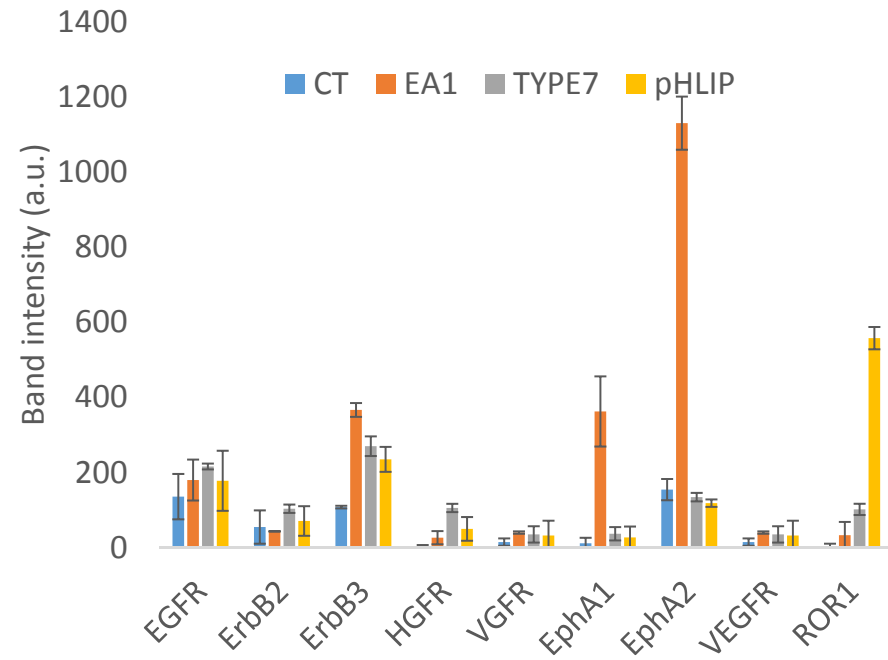

**C**

|               |        |                |       |
|---------------|--------|----------------|-------|
| TrkA          | EphA4  | FGFR2 alpha    | c-Ret |
| TrkB          | EphA5  | FGFR3          | ROR1  |
| TrkC          | EphA6  | FGFR4          | ROR2  |
| VEGF R1/Flt-1 | EphA7  | Flt-3/Flk-2    | Ryk   |
| VEGF R2/KDR   | EphA10 | HGFR/c-MET     | Tie-1 |
| VEGF R3/Flt-4 | EphB1  | IGF-IR         | Tie-2 |
| SCF R/c-kit   | EphB2  | InsulinR/CD220 |       |
| ALK/CD246     | EphB3  | M-CSFR         |       |
| Axl           | EphB4  | Mer            |       |
| DDR1          | EphB6  | MSPR/Ron       |       |
| DDR2          | ErbB3  | MuSK           |       |
| Dtk           | ErbB4  | PDGFR alpha    |       |
| EphA3         | FGFR1  | PDGFR beta     |       |
