# Supplementary material for: A novel pH-dependent membrane peptide that binds to EphA2 and inhibits cell migration
Source: eLife journal article supplement (doi:10.7554/elife.36645), 2018-09-17
Supplement: supp [file elife-36645-supp-v1.zip]

Archive with 13 entries (13 files):
- elife_poa_e36645_Figure_3_figure_supplement_5.pdf
- elife_poa_e36645_Figure_3_figure_supplement_1.pdf
- elife_poa_e36645_Figure_1_figure_supplement_2.pdf
- elife_poa_e36645_Figure_3_figure_supplement_2.pdf
- elife_poa_e36645_Figure_4_figure_supplement_1.pdf
- elife_poa_e36645_Figure_3_figure_supplement_4.pdf
- elife_poa_e36645_Figure_4_figure_supplement_2.pdf
- elife_poa_e36645_Figure_3_figure_supplement_3.pdf
- elife_poa_e36645_Transparent_Reporting_File.docx
- elife_poa_e36645_Figure_4_figure_supplement_3.pdf
- elife_poa_e36645_Figure_1_figure_supplement_4.pdf
- elife_poa_e36645_Figure_1_figure_supplement_1.pdf
- elife_poa_e36645_Figure_1_figure_supplement_3.pdf
