# Supplementary figures and images for: A novel pH-dependent membrane peptide that binds to EphA2 and inhibits cell migration
Source: eLife journal article supplement (doi:10.7554/elife.36645), 2018-09-17

## Figure Supplement 11

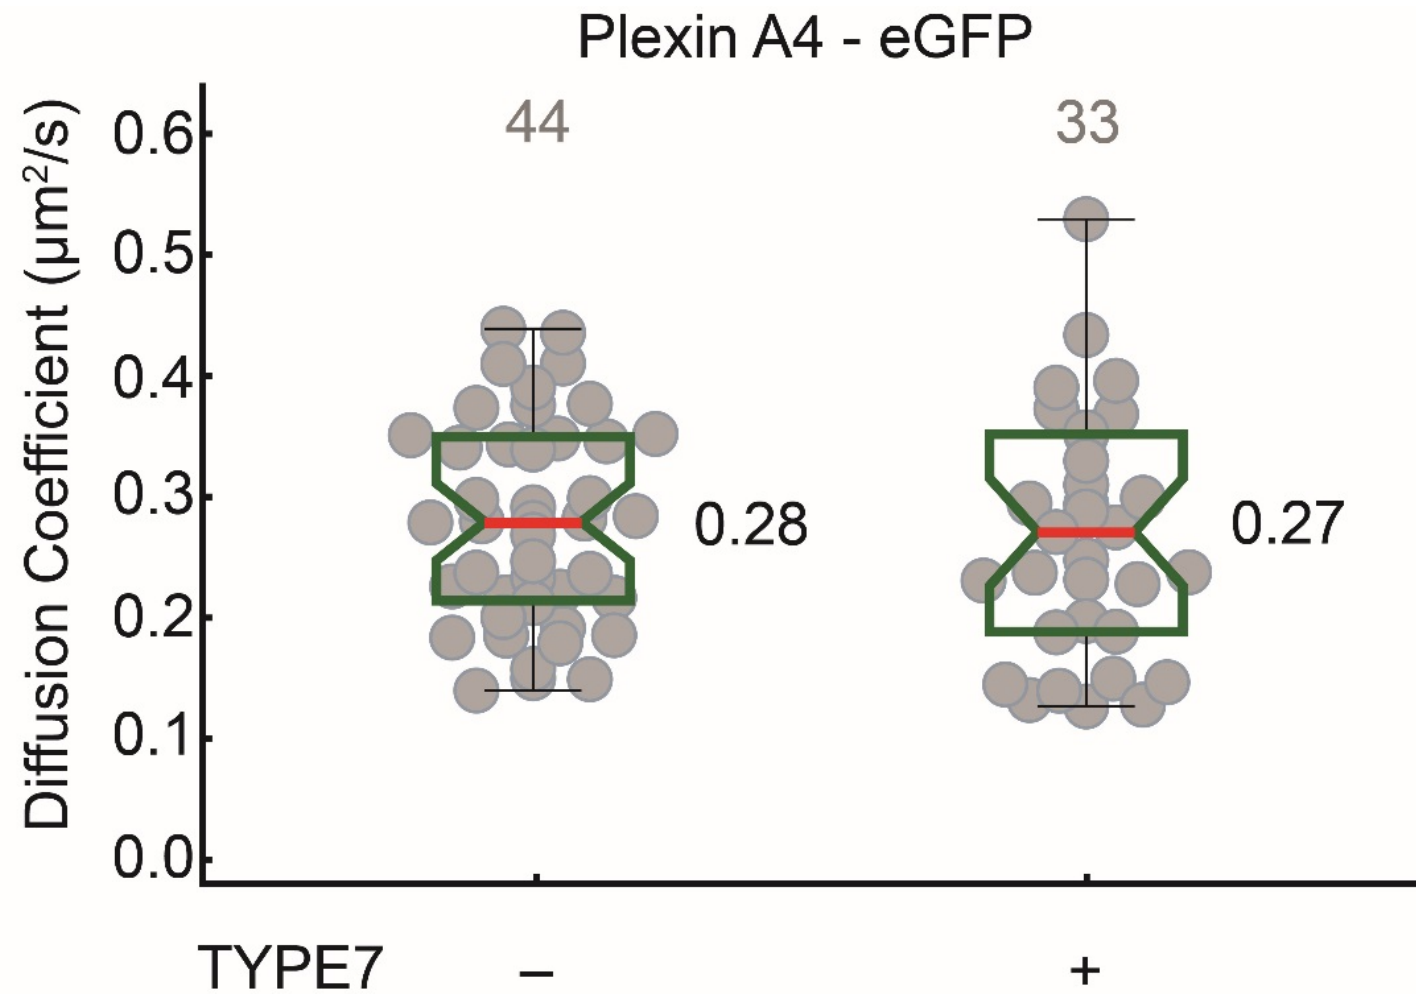

Supplement: supp [file elife-36645-supp-v1.zip]

# Figure Supplement 8

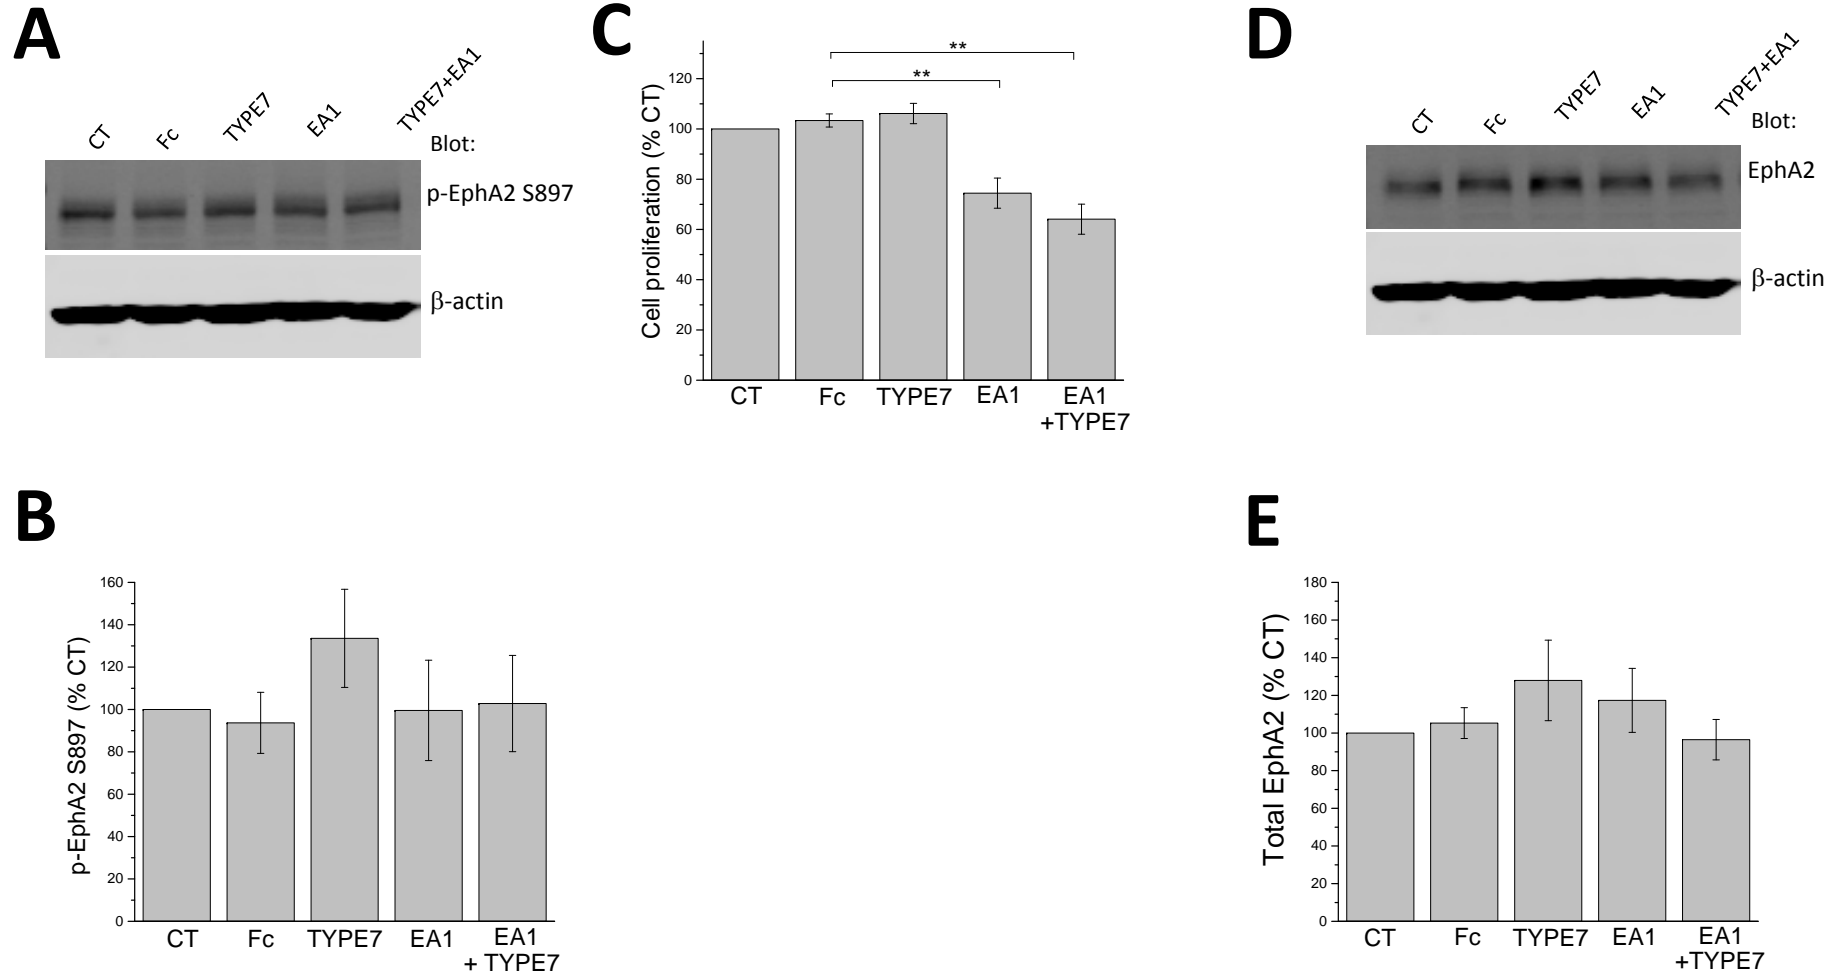

Supplement: supp [file elife-36645-supp-v1.zip]

## Figure Supplement 5

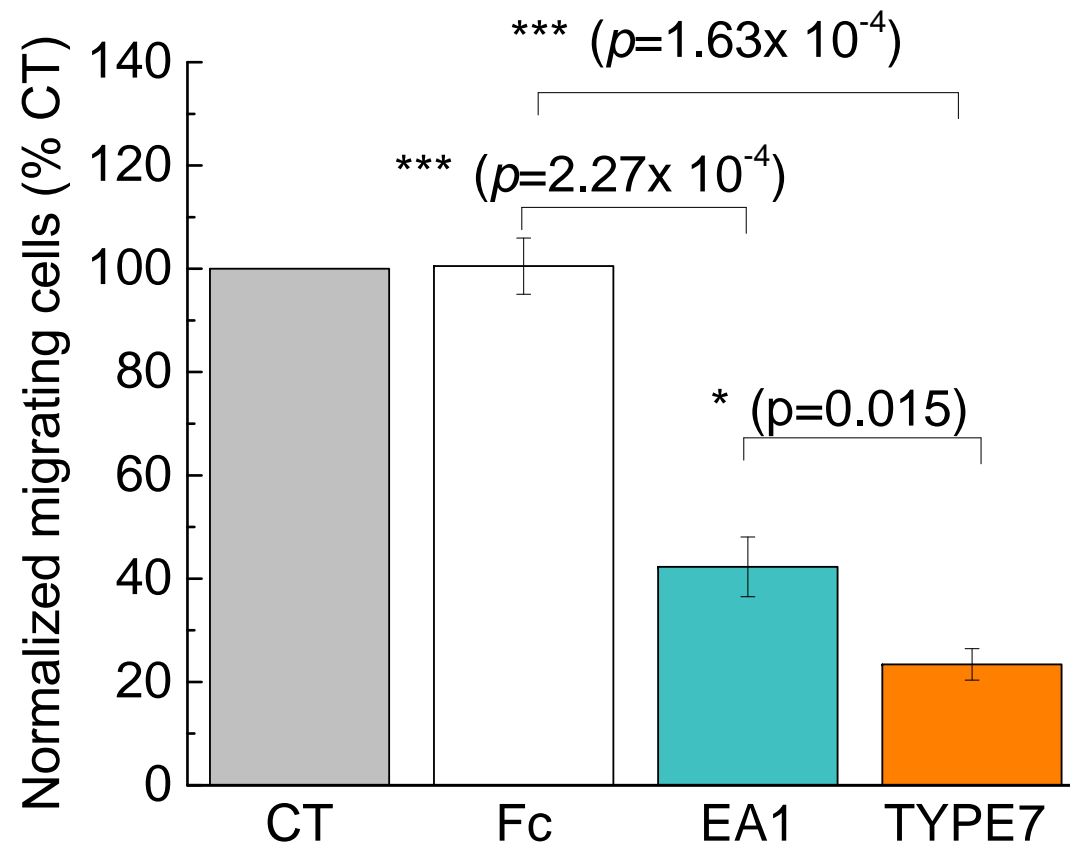

Supplement: supp [file elife-36645-supp-v1.zip]

# Figure Supplement 4

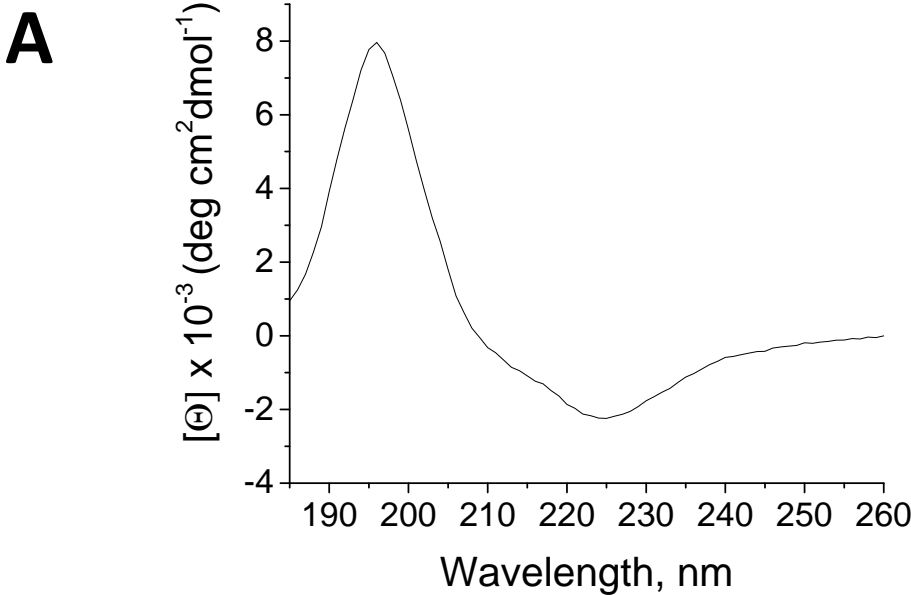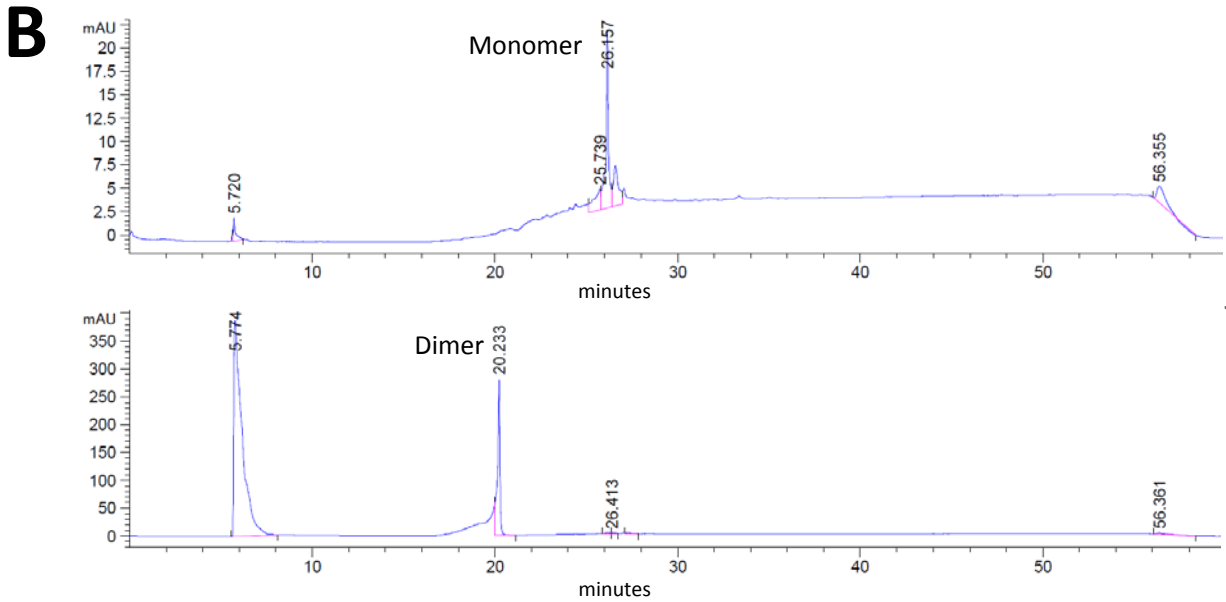

Supplement: supp [file elife-36645-supp-v1.zip]

Figure Supplement 2

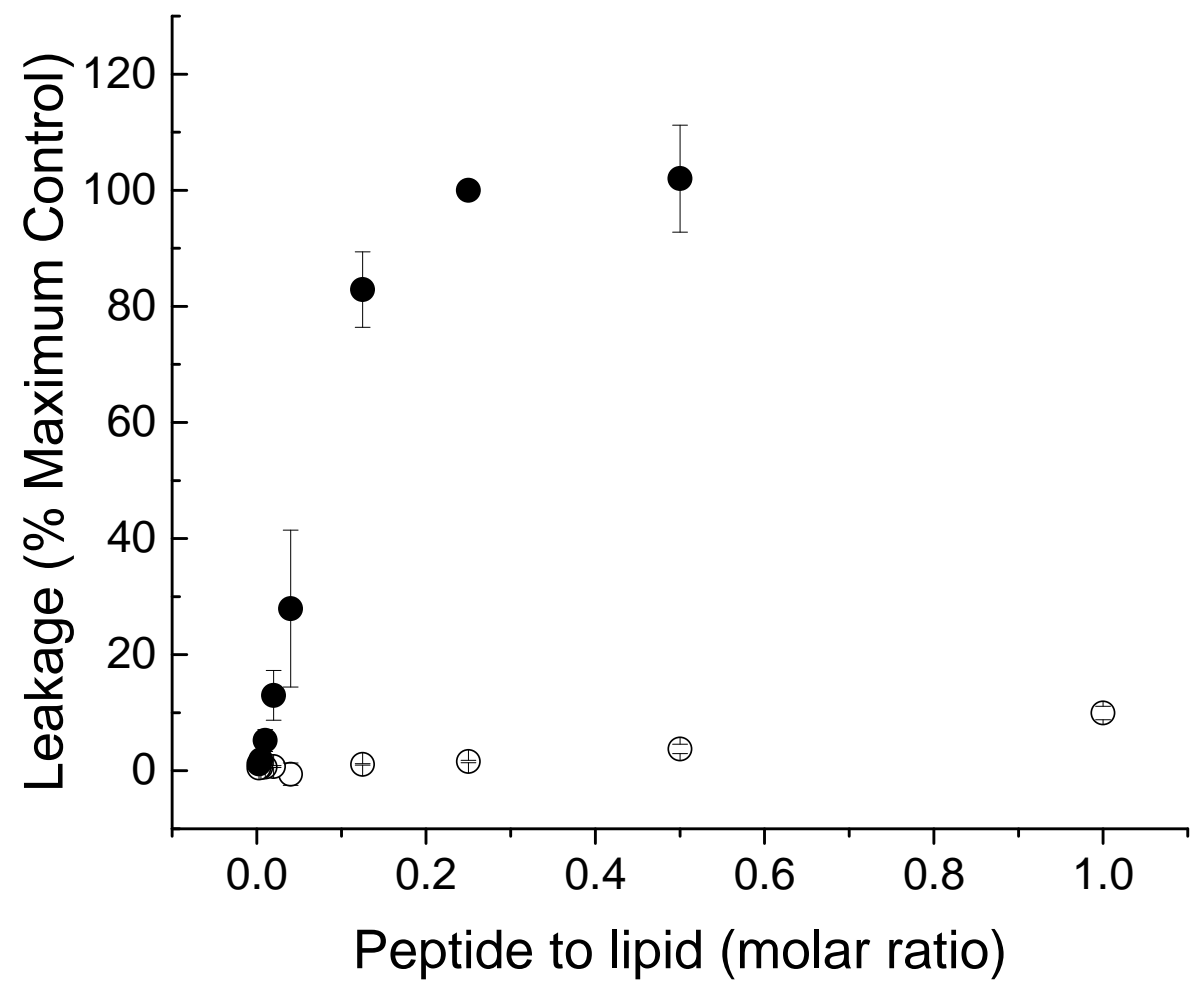

Supplement: supp [file elife-36645-supp-v1.zip]

# Figure Supplement 12

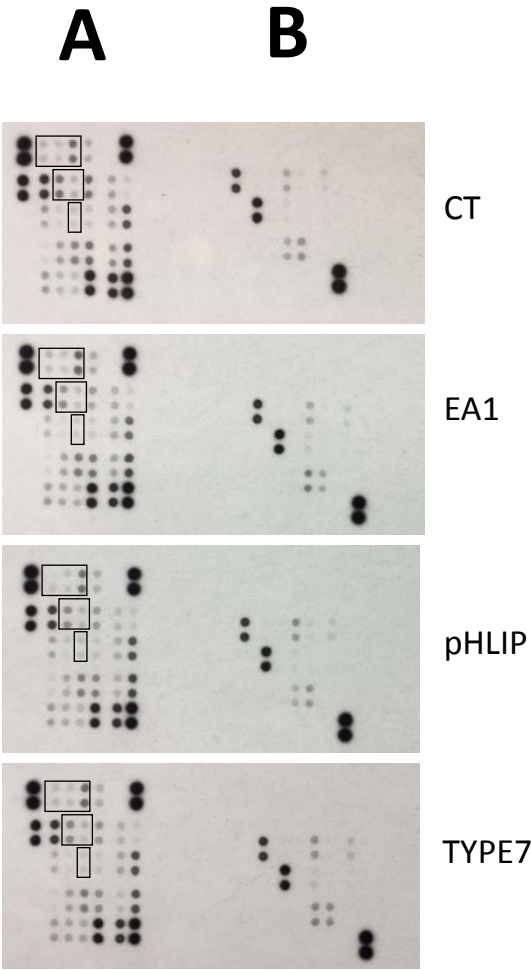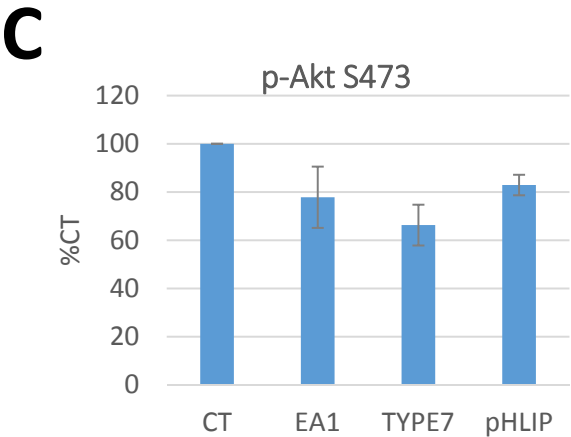

Supplement: supp [file elife-36645-supp-v1.zip]

# Figure Supplement 1

**A**

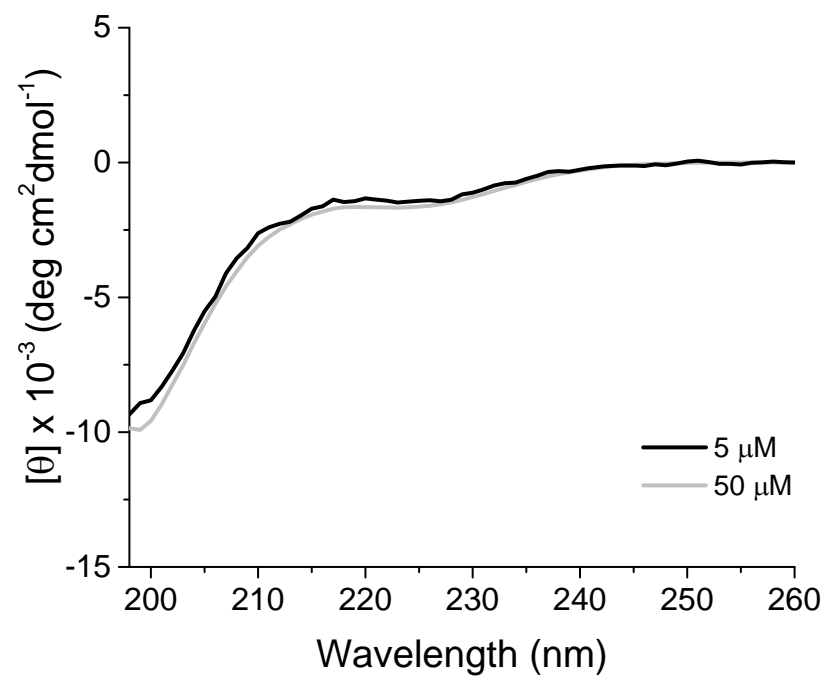

**B**

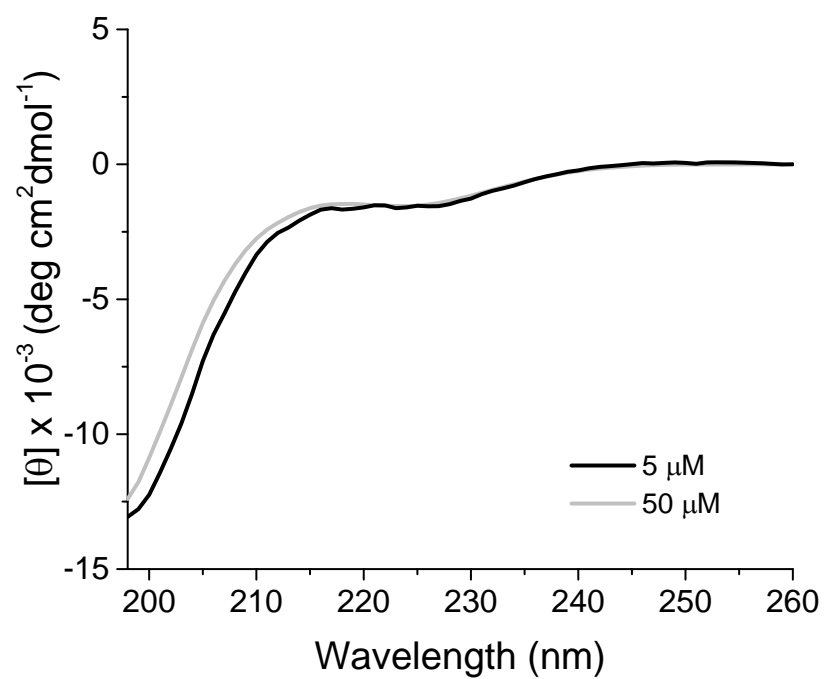

Supplement: supp [file elife-36645-supp-v1.zip]

# Figure Supplement 3

**A**

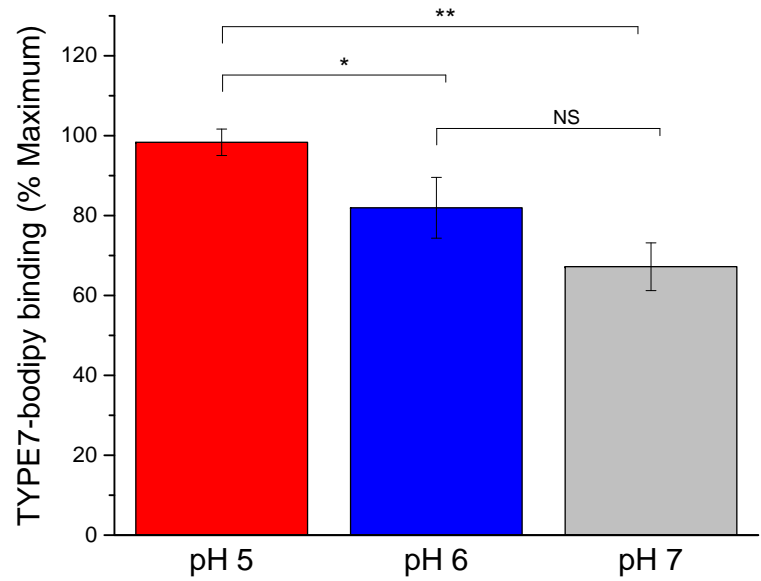

**B**

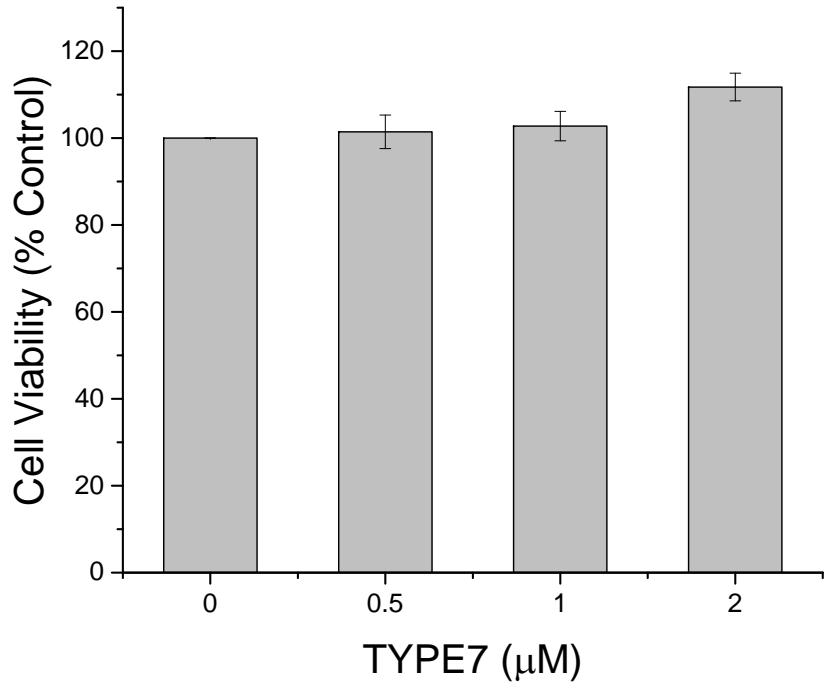

**C**

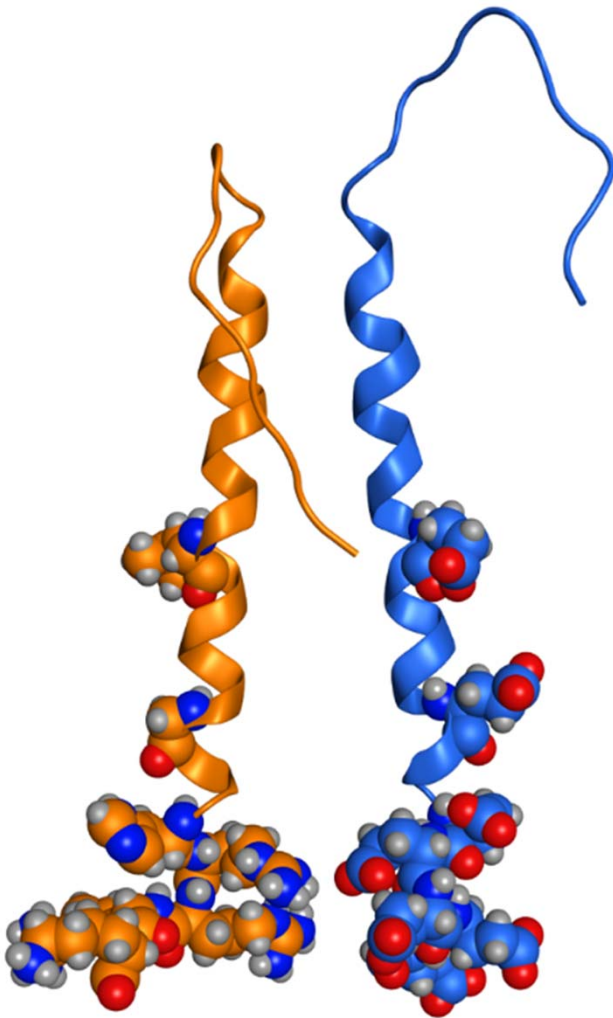

Supplement: supp [file elife-36645-supp-v1.zip]

# Figure Supplement 10

**A**

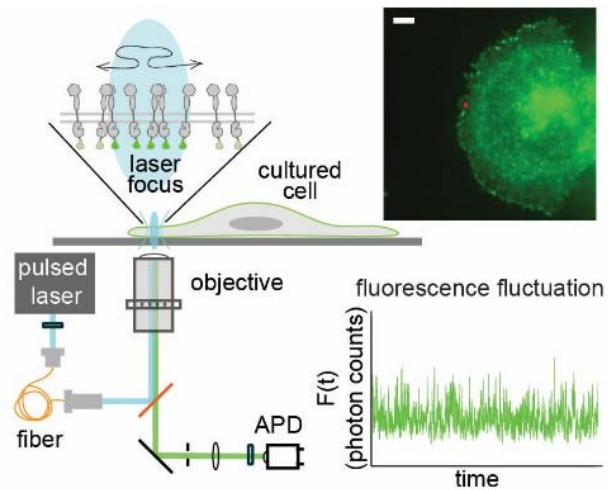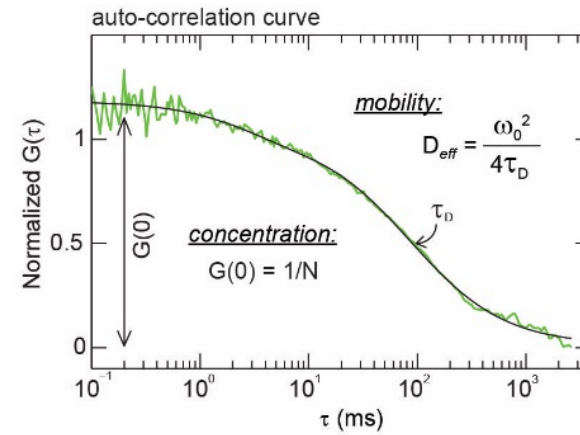

**B**

EphA2FL-GFP

EphA2ΔJ-GFP

Myr-EphA2 ICD-GFP (COS7 cells)

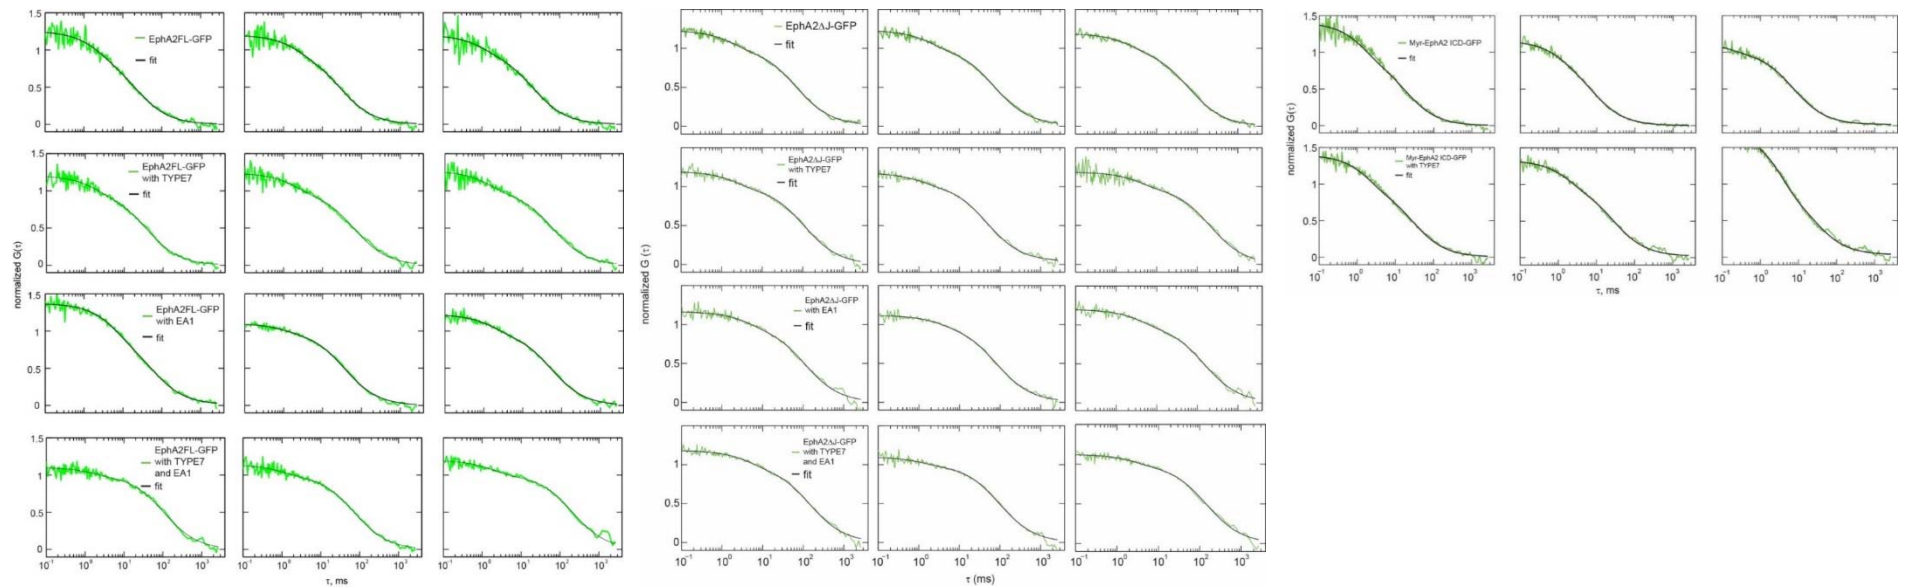

**C**

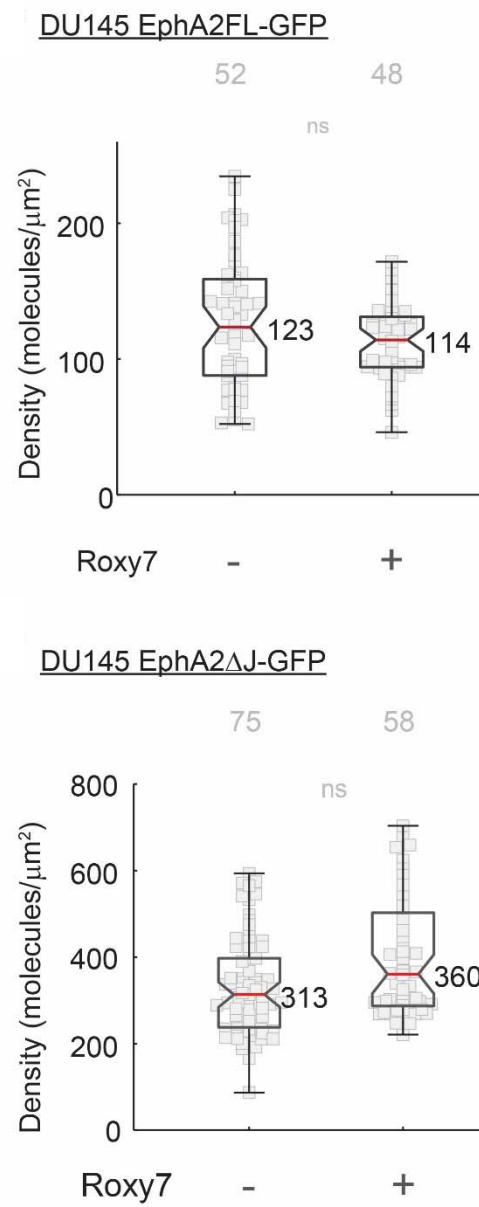

**D**

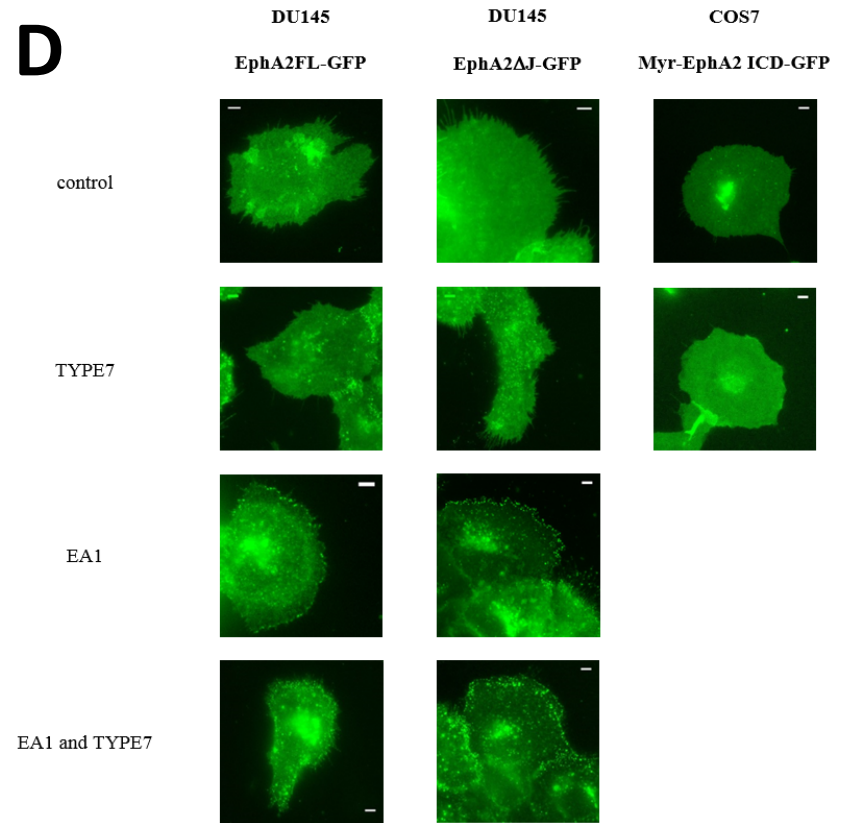

Supplement: supp [file elife-36645-supp-v1.zip › elife_poa_e36645_Figure_4_figure_supplement_1.pdf]

# Figure Supplement 7

**A**

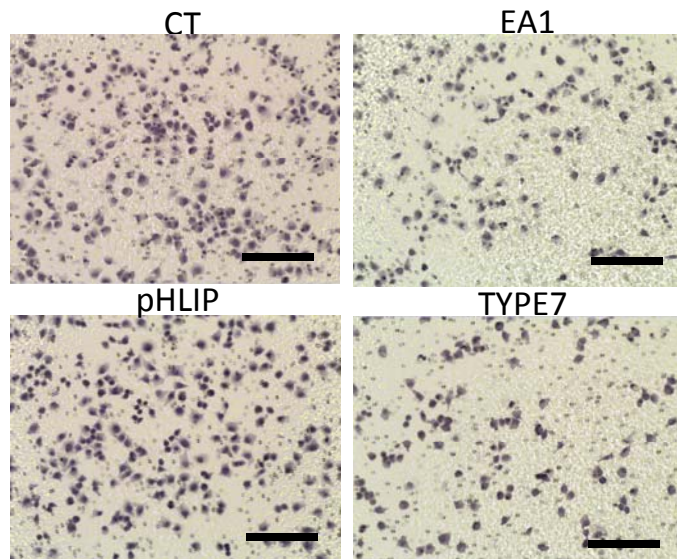

**B**

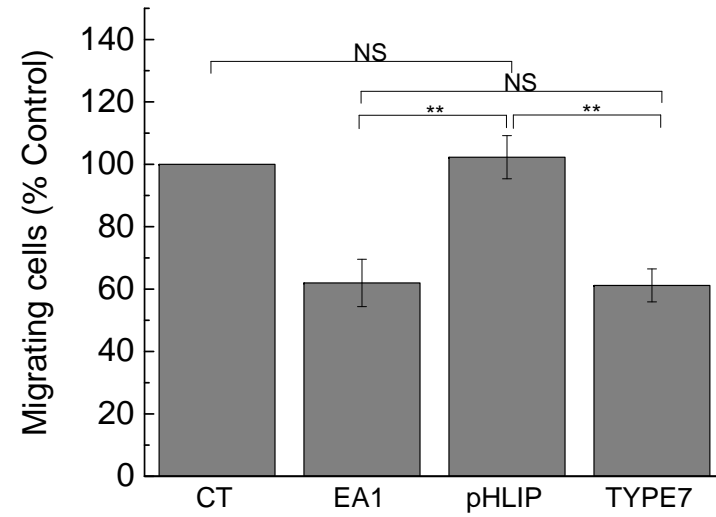

Supplement: supp [file elife-36645-supp-v1.zip › elife_poa_e36645_Figure_3_figure_supplement_3.pdf]
